# Supplementary material for: Base Composition and Translational Selection are Insufficient to Explain Codon Usage Bias in Plant Viruses
Source: Viruses. 2013 Jan 15;5(1):162–81. doi: 10.3390/v5010162 (PMC3564115; doi:10.3390/v5010162)
Supplement: Supplementary File 1 — Supplemental Table (XLSX, 56 KB) [file viruses-05-00162-s001.xlsx]

## Sheet: Geminivirus
	Geminiviruses
	African Cassava Mosaic	Ageratum Enation	BDV	BYMV	Cotton Leaf Curl Burewala	Cotton leaf curl Gezira	Cotton Leaf Curl Multan	East African Cassava Mosaic	Honeysuckle mosaic	MSV	Mungbean	PSV	Squash leaf curl	TLCND	TLCT	TYLC	WDV
	FJ807631.1	JF728867.1	FJ620684.1	GU112080.1	325994893	337294537	EU365616.1	16326664	133874356	EF547115.1	AY547317.1	EU224265.1	JN587811.1	343098574	AF206674.1	GU434144.1	FJ546176.1
	AY211466.1	JF728866.1	218606041	GU112079.1	325994887	337294528	GQ924756.1	JN053459.1	9651143	EF547114.1	283483119	EU224264.1	EU487031.1	HQ264185.1	AF141922.1	GU434141.1	191174733
	JN053431.1	JF728865.1	218606046	GU112078.1	325994881	337294512	GU574208.1	JN053458.1	148781874	EF547113.1	283483127	EU224263.1	HM566112.1	GU112088.1	EF577264.1	GU434142.1	FJ546193.1
	JN053430.1	JF728864.1	218091955	GU112077.1	315466365	337294504	EF465535.1	JN053457.1	148781881	EF547112.1	EU523045.1	EU224262.1	AF509743.1	GU112086.1	EF577266.1	FJ646611.1	FJ546181.1
	JN053429.1	JF728863.1	218091940	GU112076.1	315466359	EU432374.1	GQ503175.1	JN053455.1	30038749	EF547111.1	DQ400847.1	EU224261.1	AF509741.1	GU112084.1	GU208517.1	JQ004046.1	FJ546180.1
	JN053428.1	JF728862.1	218091929	GU112075.1	315466354	AY036007.1	AY765257.1	JN053454.1	30038741	EF547109.1	DQ389154.1	GQ415401.1	S77090.1	GU112082.1	GU208515.1	JQ038240.1	FJ546179.1
	JN053427.1	JF728861.1	218090010	GU112074.1	315466348	AY036010.1	AY765256.1	JN053453.1	30038733	EF547110.1	DQ389152.1	GQ415400.1	HM101172.1	HM989845.1	GU208518.1	JQ038238.1	FJ546178.1
	JN053426.1	JF728860.1	218091966	GU112073.1	315466342	AY036008.1	AY765253.1	JN053452.1	30038725	EF547108.1	DQ389150.1	GQ415399.1	GU967381.1	HQ141673.1	GU208516.1	JQ038236.1	166997741
	JN053425.1	308275339	218091935	GU112072.1	315466337	AY036006.1	DQ191160.1	JN053451.1	30038717	EF547107.1	DQ389155.1	GQ415398.1	AY396151.2	DQ989325.1	GU723749.1	JQ038234.1	198446601
	JN053424.1	308275323	218091924	GU112071.1	315466331	AF155064.2	FJ218487.1	JN053450.1	30038745	EF547106.1	DQ389153.1	GQ415397.1	EU573715.1	HM345979.1	GU723747.1	JQ038232.1	187761281
	JN053423.1	FJ177031.2	218091961	GU112070.1	HM461867.1	GU945265.1	FJ218486.1	JN053449.1	30038737	EF547105.1	DQ389151.1	GQ415396.1	EU543562.1	343098583	GU723745.1	JQ004052.1	187276035
	JN053422.1	GQ268327.1	149267333	GU112069.1	HM461866.1	269945565	FJ770370.1	JN053448.1	30038729	EF547103.1	DQ389149.1	GQ415395.1	AY184487.3	HM159454.1	GU723743.1	JQ004050.1	EU541489.1
	JN053421.1	EU867513.1	149267369	308152419	HM461863.1	269945558	EU384573.1	JN053447.1	30038721	EF547102.1	AY937195.1	GQ415394.1	AY686500.1	U15015.2	GU723741.1	JQ004048.1	149267361
	JN165088.1	283468142	149267326	GU112068.1	HM461862.1	269945551	21998572	JN053446.1	47155458	EF547101.1	AY271895.1	GQ415393.1	GQ225735.1	U15016.1	GU723739.1	JQ004045.1	149267353
	GQ204109.1	283468135	149267338	GU112067.1	EU365618.1	269945544	21954486	JN053445.1	47155444	EF547104.1	AF481865.2	GQ415392.1	GQ225733.1	GU180095.1	GU723737.1	JQ038239.1	149267345
	GQ204108.1	268687962		GU112066.1	283468761	269945537	7960746	JN053444.1	47155465	EF547100.1	AY049772.1	GQ415391.1	GQ225736.1	EF035482.2	GU723735.1	JQ038237.1	133919136
	GQ204107.1	219937664		GU112065.1	283468755	269945530	3005911	JN053443.1	47155451	EF547099.1	AY269992.1	GQ415390.1	GQ225734.1	EF043231.1	GU723731.1	JQ038235.1	133919132
	GQ204106.1	JF682242.1		GU112061.1	283468749	269945523	3005889	JN053442.1	30038713	EF547098.1	AY269990.1	GQ415389.1	GQ225732.1	288558207	GU723733.1	JQ038233.1	57833886
	AY211885.1	HM134237.1		GU112062.1	283468743	269945516	3005853	JN053441.1	29134787	EF547097.1	AY271893.1	GQ415388.1	FJ232922.1	GQ865546.1	GU723750.1	JQ004051.1	DQ868525.1
	AY211465.1	JF682243.1		GU112063.1	283468737	269945509	40251875	JN053440.1	40643307	EF547096.1	AF314145.1	GQ415387.1	151175695	283468616	GU723748.1	JQ004049.1	17939865
	AY211464.1	JF682240.1		GU112064.1	283468731	269945502	HQ455349.1	JN053439.1	48958398	EF547095.1	13926159	GQ415386.1	DQ026296.2	DQ116885.1	GU723746.1	JQ004047.1	68299249
	AY211463.1	EU439259.1		GU112060.1	283468725	269945495	HQ455355.1	JN053438.1		EF547094.1	AF416742.1	L39638.1	EF197940.1	DQ116883.1	GU723744.1	JN604488.1	557674
	AY211461.1	DQ343286.2		GU112059.1	283468719	269945488	HQ455356.1	JN053437.1		EF547093.1	256996619	61358	119703762	DQ116880.1	GU723742.1	JN604486.1	223889919
	AY211460.1	DQ515969.2		GU112058.1	283468713	269945481	HQ455363.1	JN053436.1		EF547092.1	256996593	EU224265.1	118196980	DQ169056.1	GU723740.1	JN604484.1	EF536886.1
	GU580897.1	GQ412352.1		GU112057.1	283468706	269945474	HQ455361.1	JN053435.1		EF547091.1	256996577	EU224261.1	4958927	DQ629101.2	GU723738.1	JN604487.1	EF536884.1
	AY211884.1	EU867514.1		GU112056.1	283468700	269945457	HQ455357.1	JN053434.1		EF547090.1	256996561	EU224264.1	JN587811.1	161338982	GU723736.1	JN604485.1	EF536883.1
	AY211462.1	JF728866.1		GU112055.1	283468694	269944767	HQ455367.1	JN053433.1		EF547089.1	256996546	EU224262.1	EU487031.1	161338988	GU723734.1	JN412854.1	EF536882.1
	FJ751235.1	JF728864.1		GU112007.1	219940335	269944760	288558224	JN053432.1		EF547088.1	256996626	GQ415401.1	HM566112.1	151175701	GU723732.1	361049794	EF536881.1
	FJ751234.1	JF728862.1		GU112005.1	GQ247893.1	269944753	AY704662.1	AY211887.1		EF547087.1	256996585	GQ415399.1	AF509743.1	FJ468356.1	AY514630.1	361049780	EF536880.1
	AF126802.1	JF728860.1		288558253	288558314	269944746	AY704660.1	AY211468.1		EF547086.1	256996569	GQ415397.1	AF509741.1	EF620534.1	EU249457.1	361049766	EF536879.1
	AF126800.1	JF728867.1		AF241479.1	EU384572.1	269944739	JN968573.1	GU580898.1		EF547085.1	256996554	EU224263.1	GU967381.1	EU309045.1	AY514631.1	361049801	EF536878.1
	AF112352.1	JF728865.1		FJ179373.1	EU384571.1	269944732	JN558352.1	AY795987.1		EF547084.1	256996538	61358	EU573715.1	151416858	AY514632.1	361049773	EF536877.1
	AF259894.1	JF728863.1		FJ179372.1	EU384570.1	269944725	JN880418.1	AY795986.1		EF547083.1	229487255	L39638.1	EU543562.1	EF068246.1	DQ871222.1	361049787	EF536876.1
	AF423177.1	JF728861.1		FJ179371.1	EU365620.1	FJ868828.1	JN678804.1	AY795985.1		EF547081.1	DQ389147.1	GQ415386.1	AY184487.3	151416851	22035838	JN183880.1	EF536875.1
	EU155147.1	308275323		FJ179370.1	EU365619.1	EU432373.1	JN678803.1	AF126806.1		EF547082.1	DQ389145.1	GQ415395.1	219938428	EF450316.1		JN183878.1	EF536874.1
	AY562429.1	308275339		FJ176236.1	JF798576.1	FJ469627.1	HQ455365.1	AF126804.1		EF547080.1	27764401	GQ415393.1	151175695	AF448059.2		JN183876.1	EF536873.1
	AY562423.1	GQ268327.1		FJ176235.1	FN645938.1	FJ469626.1	HQ455361.1	AF423178.1		EF547079.1	27764387	GQ415391.1	DQ026296.2	AF448058.2		JN183874.1	EF536872.1
	AY562422.1	FJ177031.2		EU589392.1	288558328	EU024120.1	HQ455356.1	AY562430.1		EF547078.1	16151551	GQ415389.1	EF197940.1	40781690		JN183872.1	223889923
	AY562421.1	EU867513.1		EU482411.1	288558321	224762663	HQ455353.1	AY562428.1		EF547077.1	27764408	GQ415387.1	119703762	AY286316.1		JN183879.1	EF536871.1
	288996033	283468135		3006000	288558312	FJ030878.1	HQ455348.1	AY562427.1		EF547076.1	27764394	GQ415400.1	118196980	110566625		JN183877.1	EF536870.1
	AF366902.1	283468142		HQ845753.1	288558222	FJ030874.1	HQ455367.1	AY562426.1		EF547075.1	JN368438.1	GQ415398.1	4958927	84874956		JN183875.1	EF536869.1
	221360427	268687962		EF417918.1	JF509747.1	GU935340.1	EU365616.1	AY562425.1		EF547074.1	JN368436.1	GQ415396.1	Sweet potato	AY939926.1		JN183873.1	EF536868.1
	2735852	219937664		AY738095.1	JF510461.1	GU935339.1	GQ924756.1	AY562424.1		EF547073.1	JN368434.1	GQ415394.1	HQ393473.1	3445387		JN183873.1	EF536867.1
	EU685325.1	19171488		288558278	JF502373.1	GU935338.1	GU574208.1	288996026		EF547072.1	JN368432.1	GQ415392.1	JF768740.1	JF825865.1		JN990928.1	EF536866.1
	EU685324.1			EU184017.1	JF502371.1	GU935337.1	EF465535.1	148897817		EF547071.1	JN368439.1	GQ415390.1	JF736657.1	JN410653.1		JN990926.1	EF536865.1
	EU685320.1			3006008	JF502368.1	AM691763.1	GQ503175.1	148897810		EF547070.1	JN368437.1	GQ415388.1	HQ333142.1	JN410652.1		JN990924.1	EF536864.1
	EU685318.1			3005991	JF502366.1	AY036010.1	AY765256.1	148897803		EF547069.1	JN368435.1		HQ333141.1	JN410651.1		JN990922.1	EF536863.1
	148897838			AJ278862.1	JF502360.1	AY036007.1	AY765253.1	148897796		EF547068.1	JN368433.1		HQ333140.1	JN410650.1		JN990927.1	EF536862.1
	148897831			AJ278861.1	JF502356.1	AY036006.1	AY765257.1	148897789		EF547067.1	JN181006.1		HQ333139.1	HQ840736.1		JN990925.1	EF536861.1
	148897824			AJ278860.1	JF502354.1	AY036008.1	DQ191160.1	148897782		EF547066.1	JN181004.1		HQ333138.1	HQ597033.1		JN990923.1	EF536860.1
	AM296494.1			288558278	JF502372.1	EU432374.1	FJ218486.1	148897775		EF547065.1	JN181005.1		HQ333137.1	317415729		JF451352.1	EF536859.1
	AM296493.1			288558253	JF502370.1	337294537	FJ770370.1	148897768		EF547064.1	JN181003.1		HQ333136.1	HM856628.1		JN680150.1	187276032
	AY795982.1			GU112080.1	JF502367.1	337294520	EU384573.1	148897761		EF547063.1	325994899		HQ333135.1	HM856625.1		JN680149.1	FJ546192.1
	18250474			GU112078.1	JF502365.1	337294504	21998572	148897747		59365	308275332		EF456744.2	HM245383.1		350529254	FJ546191.1
	58436			GU112076.1	JF502357.1	337294512	21954486	148897754		59364	DQ389148.1		EU856366.2	227301913		JN680353.1	FJ546190.1
	58434			GU112074.1	JF502355.1	AF155064.2	3005911	148897740		2980742	293321453		EU309693.1	GU831543.1		GQ352537.1	FJ546189.1
	58432			GU112072.1	JF502353.1	GU945265.1	7960746	89330831		2980734	283483111		HM754641.1	GU831542.1		GQ352538.1	FJ546188.1
	Z83252.1			GU112070.1	288558304	269945565	3005889	89330824		2911675	256996633		HM754640.1	GU831541.1		JF414237.1	FJ546187.1
	379131229			GU112068.1	JN678802.1	269945551	3005853	89330817		2911648	GU591171.1		HM754639.1	GU831540.1		JF414236.1	FJ546186.1
	379131215			GU112066.1	JN678805.1	269945537	40251875	89330811		1134860	GQ387510.1		HM754638.1	GU831539.1		HM130913.1	FJ546185.1
	379131205			GU112064.1	357196722	269945523		89330804		2980726	GQ387506.1		HM754637.1	EU439258.1		HM130914.1	FJ546184.1
	379131222			GU112062.1	325994893	269945509		89330797		2980718	GQ387504.1		HM754636.1	EU366163.1		HM130912.1	FJ546183.1
	HM468428.1			GU112060.1	325994881	269945495		89330790		2980710	GQ387502.1		FJ515896.1	EU439261.1		JF964959.1	FJ546182.1
	FJ807631.1			GU112058.1	325994887	269945481		89330783		2980702	GQ387507.1		295042100	EU439260.1		JF301668.1	FJ546177.1
	JN053427.1			GU112056.1	315466365	269945467		89330776		2911664	GQ387505.1		FJ969837.1	EU375489.1		JF301667.1	JQ647508.1
	JN053425.1			GU112006.1	315466342	269944767		89330769		2911656	GQ387503.1		FJ969836.1	EF194275.1		339727824	JQ647506.1
	JN053423.1			GU112079.1	315466331	269944753		89330762		2911640	GQ387501.1		FJ969835.1	AF102276.1		339727817	JQ647504.1
	JN053421.1			GU112077.1	315466359	269944739		89330755		575645	AY271895.1		FJ969834.1	288558249		HQ702863.1	JQ647502.1
	JN053428.1			GU112075.1	315466348	269944725		89330748		575643	AY271893.1		FJ969833.1	288558236		HQ702861.1	JQ647500.1
	JN053426.1			GU112073.1	HM461866.1	269945558		89330741		575641	AY049772.1		FJ969832.1	288558205		HQ702862.1	JQ647498.1
	JN053424.1			GU112071.1	HM461862.1	269945544		89330734		575639	JN368439.1		EU267799.1	GQ284842.2		JF817218.1	JQ647496.1
	JN053422.1			GU112069.1	HM461867.1	269945530		89330727		575637	JN368437.1		AF104036.1	GQ284843.1		JF833036.1	JQ647494.1
	JN165088.1			GU112067.1	HM461863.1	269945516		89330720		575635	JN368435.1		EU856364.2	283468804		334883211	JQ647492.1
	GQ204108.1			GU112065.1	EU365618.1	269945502		89330713		575633	JN368433.1		DQ644563.1	EF043230.1		334883197	JQ647490.1
	GQ204106.1			GU112063.1	283468761	269945488		89330706		575631	JN368438.1		DQ644562.1	AY428769.1		334883218	JQ647488.1
	GQ204109.1			GU112061.1	283468749	269945474		89330699		575629	JN368436.1		DQ644561.1	DQ629102.1		334683422	JQ647486.1
	GQ204107.1			GU112059.1	283468737	269945457		89330692		575627	JN368434.1		FJ560719.1	DQ431846.1		GU325633.1	JQ647484.1
	GQ169505.1			GU112057.1	283468725	269944760		89330685		575625	JN368432.1		FJ515898.1	DQ272540.2		GQ141873.1	JQ647482.1
	GU580897.1			GU112055.1	283468700	269944746		89330678		575623	308275332		FJ515897.1	GQ225737.1		GU325634.1	JQ647480.1
	AF259894.1			GU112007.1	283468713	269944732		89330671		HQ693474.1	325994899		FJ176701.1	EU847240.1		GU325632.1	JQ647478.1
	FJ751233.1			GU112005.1	283468755	AF260241.1		89330664		HQ693473.1	293321453		195963285	AJ889185.1		GU126513.1	JQ647476.1
	FJ751234.1			AF241479.1	283468743	FJ868828.1		89330657		HQ693472.1	283483111		195963278	EF612715.1		FJ956706.1	JQ647474.1
	AF112352.1			FJ179371.1	283468731	FJ469626.1		89330651		HQ693471.1	256996633		77917417	EF063145.2		GU434143.1	JQ647472.1
	AF126802.1			FJ176236.1	283468719	224762663		89330645		HQ693470.1	AF126406.1		EU253456.1	EU224371.1		JF727878.1	JQ647470.1
	AF126800.1			FJ179372.1	283468706	EU024120.1		89330638		HQ693469.1	283483127		DQ512731.1	156622378		FJ956705.1	JQ647468.1
	AY211885.1			FJ179370.1	283468694			89330631		HQ693468.1	283483119		4210720	EF123060.1		FJ956703.1	JQ647466.1
	AY211884.1			FJ176235.1	219940335			89330624		HQ693467.1	EU523045.1		195963292	AY883570.2		FJ956701.1	JQ647464.1
	288996033			EU589392.1	GQ247893.1			89330617		HQ693466.1	DQ400847.1		HQ393473.1	DQ272541.1		FJ956704.1	JQ647462.1
	AF366902.1			EU482411.1	EU384572.1			89330611		HQ693465.1	DQ389154.1		JF768740.1	AJ854186.2		FJ956702.1	JQ647460.1
	221360427			3006000	EU384570.1			89330604		HQ693464.1	AY937195.1		JF736657.1	DQ141676.1		323714214	JQ647458.1
	EU685325.1				EU365620.1			89330597		HQ693463.1	DQ389153.1		HQ333142.1	AM040437.1		323714207	JQ647456.1
	EU685322.1				EU365620.1			89330590		HQ693462.1	AF481865.2		HQ333141.1	JN208136.1		GU111505.1	JQ647454.1
	EU685318.1				EU365619.1			89330583		HQ693461.1	AY269992.1		HQ333140.1	JN809814.1		224993901	JQ647507.1
	EU685328.1							89330576		HQ693460.1	AY269990.1		HQ333139.1	JN129254.1		224993887	JQ647505.1
	EU685324.1							89330569		HQ693459.1	AF314145.1		HQ333138.1	349500667		224993894	JQ647503.1
	EU685320.1							89330562		HQ693458.1	AF361431.1		HQ333137.1	343098583		224993880	JQ647501.1
	148897831							89330562		HQ693457.1	AF416742.1		HQ333136.1	343098574		224962068	JQ647499.1
	148897838							89330555		HQ693456.1	256996601		HQ333135.1	HQ264185.1		HM856919.1	JQ647497.1
	148897824							89330555		HQ693455.1	256996585		EF456744.2	AF102276.1		HM856917.1	JQ647495.1
	AY795982.1							89330550		HQ693454.1	256996569		EU856366.2	GU112088.1		HM856915.1	JQ647493.1
	18250474							89330543		HQ693453.1	256996554		EU309693.1	GU112086.1		HM856913.1	JQ647491.1
								83721797		HQ693452.1	256996538		HM754641.1	GU112084.1		HM856911.1	JQ647489.1
								83721790		HQ693451.1	256996619		HM754640.1	GU112082.1		HM856909.1	JQ647487.1
								83721783		HQ693450.1	256996606		HM754639.1	HM989845.1		HM856918.1	JQ647485.1
								2230831		HQ693449.1	256996593		HM754638.1	HQ141673.1		HM856916.1	JQ647483.1
								83721776		HQ693448.1	256996577		HM754637.1	DQ989325.1		HM856914.1	JQ647481.1
								3892565		HQ693447.1	256996561		HM754636.1	HM345979.1		HM856912.1	JQ647479.1
								2230818		HQ693446.1	229487255		FJ515896.1	HM159454.1		HM856910.1	JQ647477.1
								2230833		HQ693445.1	FJ821189.1		295042100	U15015.2		HM988987.1	JQ647475.1
								3204176		HQ693444.1	27764408		FJ969837.1	U15016.1		GU076454.1	JQ647473.1
								JN053459.1		HQ693443.1	27764394		FJ969836.1	GU180095.1		GU076452.1	JQ647471.1
								JN053457.1		HQ693442.1	27764387		FJ969835.1	GQ865546.1		GU076450.1	JQ647469.1
								JN053455.1		HQ693441.1			FJ969834.1	283468804		GU076448.1	JQ647467.1
								JN053453.1		HQ693440.1			FJ969833.1	283468616		GU076446.1	JQ647465.1
								JN053451.1		HQ693439.1			FJ969832.1	EF043230.1		GU076444.1	JQ647463.1
								JN053449.1		HQ693438.1			EU267799.1	AY428769.1		GU076442.1	JQ647461.1
								JN053447.1		HQ693437.1			AF104036.1	DQ629102.1		GU076440.1	JQ647459.1
								JN053445.1		HQ693436.1			EU856364.2	DQ431844.1		GU076453.1	JQ647457.1
								JN053443.1		HQ693435.1			DQ644563.1	DQ116885.1		GU076451.1	JQ647455.1
								JN053441.1		HQ693434.1			DQ644562.1	DQ116883.1		GU076449.1	JN791095.1
								JN053439.1		HQ693433.1			DQ644561.1	DQ116880.1		GU076447.1	JN791096.1
								JN053437.1		HQ693432.1			FJ560719.1	DQ169056.1		GU076445.1	EF536885.1
								JN053435.1		HQ693431.1			FJ515898.1	DQ629101.2		GU076443.1	EF536883.1
								JN053433.1		HQ693430.1			FJ515897.1	161338982		GU076441.1	EF536881.1
								JN053458.1		HQ693429.1			FJ176701.1	151175701		DQ644565.1	EF536879.1
								JN053456.1		HQ693428.1			195963285	161338988		HQ260984.1	EF536877.1
								JN053454.1		HQ693427.1			195963278	219937569		EU085423.2	EF536875.1
								JN053452.1		HQ693426.1			77917417	FJ468356.1		AF105975.1	EF536873.1
								JN053450.1		HQ693425.1			EU253456.1	EF620534.1		GU563330.1	EF536871.1
								JN053448.1		HQ693424.1			DQ512731.1	EU309045.1		GU199587.1	EF536869.1
								JN053446.1		HQ693423.1			4210720	156622378		EU031444.1	EF536867.1
								JN053444.1		HQ693422.1			195963292	151416851		HM627885.1	EF536865.1
								JN053442.1		HQ693421.1			HM754634_1	151416858		HM627883.1	EF536863.1
								JN053440.1		HQ693420.1			HQ270526.1	EF068246.1		HM627881.1	EF536861.1
								JN053438.1		HQ693419.1			HQ270525.1	EF450316.1		HM627884.1	EF536859.1
								JN053436.1		HQ693418.1			HQ270524.1	AF448058.2		HM627882.1	EF536886.1
								JN053434.1		HQ693417.1			HQ270523.1	AF448059.2		HM627880.1	EF536884.1
								JN053432.1		HQ693416.1			HQ270522.1	40781690		HM459851.1	EF536882.1
								AY795988.1		HQ693415.1			HQ270521.1	AY286316.1		HM448447.1	EF536880.1
								AY795986.1		HQ693414.1			HQ270520.1	110566625		HM856873.1	EF536878.1
								AY795987.1		HQ693413.1			HQ270519.1	DQ119573.2		HM358879.1	EF536876.1
								AY795985.1		HQ693412.1			HQ270518.1	84874956		HM208334.1	EF536874.1
								AY211887.1		HQ693411.1			HQ270517.1	AY939926.1		EF210554.1	EF536872.1
								288996026		HQ693410.1			HQ270516.1	3445387		EF210555.1	EF536870.1
								89330831		HQ693409.1			HQ270514.1			EF539831.1	EF536868.1
								89330817		HQ693408.1			HQ270515.1			EU847740.1	EF536866.1
								89330804		HQ693407.1			HQ270513.1			FJ439569.1	EF536864.1
								89330790		HQ693406.1			HQ270512.1			GU322424.2	EF536862.1
								89330776		HQ693405.1			HQ270511.1			GU322423.2	EF536860.1
								89330762		HQ693404.1			HQ270509.1			GU355941.1	295042140
								89330748		HQ693403.1			HQ270510.1			FJ609655.1	295042146
								89330734		HQ693402.1			HQ270508.1			GU178820.1	295042134
								89330720		HQ693401.1			HQ270507.1			GU178818.1	295042143
								89330706		HQ693400.1			HQ270506.1			GU178816.1	FJ546191.1
								89330692		HQ693399.1			HQ270505.1			GU178814.1	FJ546189.1
								89330678		HQ693398.1			HQ270504.1			GU178819.1	FJ546188.1
								89330651		HQ693397.1			HQ270503.1			GU178817.1	FJ546190.1
								89330638		HQ693396.1			EU056325.1			GU178815.1	FJ546192.1
								89330624		HQ693395.1			EF154833.1			GU178813.1	191174733
								89330611		HQ693394.1			EF151926.1			AY594175.1	FJ546181.1
								89330597		HQ693393.1			JN657686.1			AY502934.1	FJ546179.1
								89330583		HQ693392.1			JN657687.1			AY594174.1	FJ546193.1
								89330569		HQ693391.1			JF736657.1			AY530931.1	FJ546180.1
								89330555		HQ693390.1			JF736657.1			AF024715.2	FJ546178.1
								89330543		HQ693389.1			AF288227.1			AY134494.1	198446601
								89330824		HQ693388.1			JF768740.1			62484953	187761281
								89330811		HQ693387.1			HQ393473.1			41016711	187276035
								89330797		HQ693386.1			HQ333141.1			41016697	EU541489.1
								89330783		HQ693385.1			HQ333139.1			41016683	149267361
								89330769		HQ693384.1			HQ333137.1			41016669	149267345
								89330755		HQ693383.1			HQ333142.1			209364487	149267353
								89330741		HQ693382.1			HQ333140.1			62484946	57833886
								89330727		HQ693381.1			HQ333138.1			41016718	DQ868525.1
								89330713		HQ693380.1			HQ333136.1			41016704	17939865
								89330699		HQ693379.1			AF104036.1			41016690	557674
								89330685		HQ693378.1			EU309693.1			41016676
								89330671		HQ693377.1			EF456744.2			HM043732.1
								89330657		HQ693376.1			EU856366.2			GU983859.1
								89330631		HQ693375.1			EU856364.2			AF071228.1
								89330617		HQ693374.1			HM754640.1			GU951437.1
								89330604		HQ693372.1			HM754636.1			GU951436.1
								89330590		HQ693371.1			HM754638.1			AY044138.1
								89330576		HQ693370.1			HM754634.1			GU348995.1
								89330562		HQ693369.1			HM754641.1			AY227892.1
								89330550		HQ693368.1			HM754639.1			EF060196.1
								83721797		HQ693367.1			HM754637.1			DQ631892.1
								83721783		HQ693366.1			HM754635.1			GQ861426.1
								83721790		HQ693365.1			295042100			283837145
								83721776		HQ693364.1			FJ969834.1			EU143745.1
								3892565		HQ693363.1			FJ969836.1			EF433426.1
										HQ693362.1			FJ969832.1			DQ144621.1
										HQ693361.1			FJ969837.1			DQ358913.1
										HQ693360.1			FJ969835.1			195926979
										HQ693359.1			FJ969833.1			195926986
										HQ693358.1			EU267799.1			21426900
										HQ693357.1			DQ644563.1			EU635776.1
										HQ693356.1			DQ644561.1			EU635776.1
										HQ693355.1			DQ644562.1			219965982
										HQ693354.1			FJ560719.1			219965968
										HQ693353.1			FJ515898.1			219965989
										HQ693352.1			FJ515897.1			219965975
										HQ693351.1			195963285			4190964
										HQ693350.1			195963292			4190957
										HQ693349.1			195963278			FJ355946.1
										HQ693348.1			77917417			149693170
										HQ693347.1			EU253456.1			149693148
										HQ693346.1			DQ512731.1			EF101929.1
										HQ693345.1			TLC China			EF158044.1
										HQ693344.1			JN082237.1			156138568
										HQ693343.1			JN082233.1			121495484
										HQ693342.1			AF311734.1			EF110890.1
										HQ693341.1			298882985			EF523478.1
										HQ693340.1			EU365686.1			EF185318.1
										HQ693339.1			EF011559.1			EF107520.1
										HQ693338.1			172052170			EF051116.1
										HQ693337.1			85677183			109450882
										HQ693336.1			DQ256460.1			108743008
										HQ693335.1			71060530			2808672
										HQ693334.1			94960479			38347745
										HQ693333.1			94960472			38347738
										HQ693332.1			94960465			TYLCC
										HQ693331.1			94536490			AF206674.1
										HQ693330.1			66947600			AF141922.1
										HQ693329.1			66351634			FJ687389.1
										HQ693328.1			20338751			FJ687387.1
										HQ693327.1			20330102			EF577266.1
										HQ693326.1			18077635			EF577264.1
										HQ693325.1			18077628			GU208518.1
										HQ693324.1			18076947			GU208516.1
										HQ693323.1			18076940			GU208517.1
										HQ693321.1			18076933			GU208515.1
										HQ693322.1			18076926			AY639605.1
										HQ693320.1			50344411			AY639879.1
										HQ693319.1			95101791			GU723750.1
										HQ693318.1			95101788			GU723748.1
										HQ693317.1			95101785			GU723746.1
										HQ693316.1			95101782			GU723744.1
										HQ693315.1			95101779			GU723742.1
										HQ693314.1			66947597			GU723740.1
										HQ693313.1			66947594			GU723738.1
										HQ693312.1			66947591			GU723736.1
										HQ693311.1			66947585			GU723734.1
										HQ693310.1			66947582			GU723732.1
										HQ693309.1			66947579			GU723749.1
										HQ693308.1			66947576			GU723747.1
										HQ693307.1			66947573			GU723745.1
										HQ693306.1			66947570			GU723743.1
										HQ693305.1			66947501			GU723741.1
										HQ693304.1			66947498			GU723739.1
										HQ693303.1			66947495			GU723737.1
										HQ693302.1			66947492			GU723735.1
										HQ693301.1			66947489			GU723733.1
										HQ693300.1			66947486			GU723731.1
										HQ693299.1			JF681157.1			AY514630.1
										HQ693298.1			JF681156.1			EU249457.1
										HQ693297.1			JF681154.1			AY514632.1
										HQ693296.1			JF681153.1			AY514631.1
										HQ693295.1			JF681152.1			EF457933.1
										HQ693294.1			JF681150.1			EF457931.1
										HQ693293.1			GU199591.1			EF457929.1
										HQ693292.1			GU199588.1			EF457934.1
										HQ693291.1			EF011561.1			EF457932.1
										HQ693290.1			95101848			EF457930.1
										HQ693289.1			95101845			DQ871222.1
										HQ693288.1			95101839			5731900
										HQ693287.1			95101842			GU434144.1
										HQ693286.1			95101836			GU434141.1
										HQ693285.1			95101833			GU434142.1
										HQ693284.1			95101830			FJ646611.1
										HQ693283.1			95101827			JQ004046.1
										HQ693282.1			95101824			JQ038240.1
										HQ693281.1			95101821			JQ038238.1
										AF003952.1			95101818			JQ038236.1
										AF007881.1			95101815			JQ038234.1
										224762692			95101812			JQ038232.1
										EU152255.1			95101809			JQ004052.1
										EU152254.1			95101806			JQ004050.1
										FJ882149.1			95101803			JQ004048.1
										FJ882148.1			95101800			JQ004045.1
										FJ882147.1			95101797			JQ038239.1
										FJ882146.1			95101794			JQ038237.1
										FJ882145.1			JN082233.1			JQ038235.1
										FJ882144.1			JN082237.1			JQ038233.1
										FJ882143.1			AF311734.1			JQ004051.1
										FJ882142.1			GU199588.1			JQ004049.1
										FJ882141.1			298882985			JQ004047.1
										FJ882140.1			EU365686.1			JN604488.1
										FJ882139.1			EF011559.1			JN604486.1
										FJ882138.1			172052170			JN604484.1
										FJ882137.1			85677183			JN604487.1
										FJ882136.1			DQ256460.1			JN604485.1
										FJ882135.1			71060530			JN412854.1
										FJ882134.1			94960472			361049794
										FJ882133.1			94960479			361049780
										FJ882132.1			94960465			361049766
										FJ882131.1			94536490			361049801
										FJ882130.1			66947600			361049773
										FJ882129.1			66351634			361049787
										FJ882128.1			18077628			JN183880.1
										FJ882127.1			18076947			JN183878.1
										FJ882126.1			18076933			JN183876.1
										FJ882124.1			20338751			JN183874.1
										FJ882123.1			20330102			JN183872.1
										FJ882122.1			18077635			JN183879.1
										FJ882121.1			18076940			JN183877.1
										FJ882120.1			18076926			JN183875.1
										FJ882119.1			18077635			JN183873.1
										FJ882118.1			50344411			JN183873.1
										FJ882117.1						JN990928.1
										FJ882116.1						JN990926.1
										FJ882115.1						JN990924.1
										FJ882113.1						JN990922.1
										FJ882112.1						JN990927.1
										FJ882111.1						JN990925.1
										FJ882110.1						JN990923.1
										FJ882109.1						JF451352.1
										FJ882108.1						JN680150.1
										FJ882107.1						JN680149.1
										FJ882106.1						350529254
										FJ882105.1						JN680353.1
										FJ882104.1						GQ352537.1
										FJ882103.1						GQ352538.1
										FJ882102.1						JF414237.1
										FJ882101.1						JF414236.1
										FJ882100.1						HM130913.1
										FJ882099.1						HM130914.1
										FJ882098.1						HM130912.1
										FJ882096.1						JF964959.1
										FJ882095.1						JF301668.1
										FJ882114.1						JF301667.1
										FJ882094.1						339727824
										FJ882093.1						339727817
										FJ882092.1						HQ702863.1
										FJ882091.1						HQ702861.1
										FJ882090.1						HQ702862.1
										FJ882089.1						JF817218.1
										AF395891.1						JF833036.1
										AF329889.1						334883211
										AF329888.1						334883197
										AF329887.1						334883218
										AF329886.1						334683422
										AF329885.1						GU325633.1
										AF329884.1						GQ141873.1
										AF329883.1						GU325634.1
										AF329882.1						GU325632.1
										AF329881.1						GU126513.1
										AF329880.1						FJ956706.1
										AF329879.1						GU434143.1
										AF329878.1						JF727878.1
										AF239962.1						FJ956705.1
										AF239961.1						FJ956703.1
										AF239960.1						FJ956701.1
										EU628645.1						FJ956704.1
										EU628644.1						FJ956702.1
										EU628643.1						323714214
										EU628642.1						323714207
										EU628641.1						GU111505.1
										EU628640.1						224993901
										EU628639.1						224993887
										EU628638.1						224993894
										EU628637.1						224993880
										EU628636.1						224962068
										EU628635.1						HM856919.1
										EU628634.1						HM856917.1
										EU628633.1						HM856915.1
										EU628632.1						HM856913.1
										EU628631.1						HM856911.1
										EU628630.1						HM856909.1
										EU628629.1						HM856918.1
										EU628628.1						HM856916.1
										EU628627.1						HM856914.1
										EU628626.1						HM856912.1
										EU628625.1						HM856910.1
										EU628624.1						HM988987.1
										EU628622.1						GU076454.1
										EU628621.1						GU076452.1
										EU628620.1						GU076450.1
										EU628619.1						GU076448.1
										EU628618.1						GU076446.1
										EU628617.1						GU076444.1
										EU628616.1						GU076442.1
										EU628615.1						GU076440.1
										EU628614.1						GU076453.1
										EU628613.1						GU076451.1
										EU628612.1						GU076449.1
										EU628611.1						GU076447.1
										EU628610.1						GU076445.1
										EU628609.1						GU076443.1
										EU628608.1						GU076441.1
										EU628607.1						DQ644565.1
										EU628606.1						HQ260984.1
										EU628605.1						EU085423.2
										EU628604.1						AF105975.1
										EU628603.1						GU563330.1
										EU628602.1						GU199587.1
										EU628601.1						EU031444.1
										EU628600.1						HM627885.1
										EU628599.1						HM627883.1
										EU628598.1						HM627881.1
										EU628597.1						HM627884.1
										EU628596.1						HM627882.1
										EU628595.1						HM627880.1
										EU628594.1						HM459851.1
										EU628593.1						HM448447.1
										EU628592.1						HM856873.1
										EU628591.1						HM358879.1
										EU628590.1						HM208334.1
										EU628588.1						EF210554.1
										EU628589.1						EF210555.1
										EU628587.1						EF539831.1
										EU628586.1						EU847740.1
										EU628585.1						FJ439569.1
										EU628584.1						GU322424.2
										EU628583.1						GU322423.2
										EU628582.1						GU355941.1
										EU628581.1						FJ609655.1
										EU628580.1						GU178820.1
										EU628579.1						GU178818.1
										EU628578.1						GU178816.1
										EU628577.1						GU178814.1
										EU628576.1						GU178819.1
										EU628575.1						GU178817.1
										EU628574.1						GU178815.1
										EU628573.1						GU178813.1
										EU628572.1						AY594175.1
										EU628571.1						AY502934.1
										EU628570.1						AY594174.1
										EU628569.1						AY530931.1
										EU628568.1						AF024715.2
										EU628567.1						AY134494.1
										EU628566.1						62484953
										EU628565.1						41016711
										EU628564.1						41016697
										EU152261.1						41016683
										EU152260.1						41016669
										EU152259.1						209364487
										EU152258.1						62484946
										EU152256.1						41016718
										EF547124.1						41016704
										EU152257.1						41016690
										EF547123.1						41016676
										EF547122.1						HM043732.1
										EF547120.1						GU983859.1
										EF547121.1						AF071228.1
										EF547119.1						GU951437.1
										EF547117.1						GU951436.1
										EF547118.1						AY044138.1
										EF547116.1						GU348995.1
										FJ882102.1						AY227892.1
										FJ882100.1						EF060196.1
										HQ693473.1						DQ631892.1
										HQ693469.1						GQ861426.1
										HQ693471.1						283837145
										HQ693467.1						EU143745.1
										HQ693465.1						EF433426.1
										HQ693463.1						DQ144621.1
										HQ693461.1						DQ358913.1
										HQ693459.1						195926979
										HQ693457.1						195926986
										HQ693453.1						21426900
										HQ693455.1						EU635776.1
										HQ693451.1						EU635776.1
										HQ693449.1						219965982
										HQ693447.1						219965968
										HQ693445.1						219965989
										HQ693443.1						219965975
										HQ693441.1						4190964
										HQ693439.1						4190957
										HQ693437.1						FJ355946.1
										HQ693433.1						149693170
										HQ693435.1						149693148
										HQ693431.1						EF101929.1
										HQ693429.1						EF158044.1
										HQ693425.1						156138568
										HQ693423.1						121495484
										HQ693421.1						EF110890.1
										HQ693419.1						EF523478.1
										HQ693417.1						EF185318.1
										HQ693415.1						EF107520.1
										HQ693413.1						EF051116.1
										HQ693411.1						109450882
										HQ693409.1						108743008
										HQ693407.1						2808672
										HQ693405.1						38347745
										HQ693405.1						38347738
										HQ693401.1
										HQ693399.1
										HQ693395.1
										HQ693393.1
										HQ693391.1
										HQ693389.1
										HQ693387.1
										HQ693385.1
										HQ693383.1
										HQ693381.1
										HQ693379.1
										HQ693377.1
										HQ693375.1
										HQ693373.1
										HQ693371.1
										HQ693369.1
										HQ693367.1
										HQ693365.1
										HQ693363.1
										HQ693361.1
										HQ693361.1
										HQ693357.1
										HQ693355.1
										HQ693353.1
										HQ693351.1
										HQ693349.1
										HQ693347.1
										HQ693345.1
										HQ693343.1
										HQ693341.1
										HQ693339.1
										HQ693337.1
										HQ693335.1
										HQ693333.1
										HQ693331.1
										HQ693329.1
										HQ693327.1
										HQ693325.1
										HQ693323.1
										HQ693321.1
										HQ693319.1
										HQ693317.1
										HQ693313.1
										HQ693311.1
										HQ693309.1
										HQ693307.1
										HQ693305.1
										HQ693303.1
										HQ693301.1
										HQ693299.1
										HQ693297.1
										HQ693295.1
										HQ693293.1
										HQ693291.1
										HQ693289.1
										HQ693287.1
										HQ693285.1
										HQ693283.1
										HQ693281.1
										HQ693474.1
										HQ693472.1
										HQ693470.1
										HQ693468.1
										HQ693466.1
										HQ693464.1
										HQ693462.1
										HQ693460.1
										HQ693458.1
										HQ693456.1
										HQ693454.1
										HQ693452.1
										HQ693450.1
										HQ693448.1
										HQ693446.1
										HQ693444.1
										HQ693442.1
										HQ693440.1
										HQ693438.1
										HQ693436.1
										HQ693434.1
										HQ693432.1
										HQ693430.1
										HQ693428.1
										HQ693426.1
										HQ693424.1
										HQ693422.1
										HQ693420.1
										HQ693418.1
										HQ693416.1
										HQ693412.1
										HQ693410.1
										HQ693408.1
										HQ693406.1
										HQ693404.1
										HQ693402.1
										HQ693400.1
										HQ693398.1
										HQ693396.1
										HQ693394.1
										HQ693392.1
										HQ693390.1
										HQ693388.1
										HQ693386.1
										HQ693384.1
										HQ693382.1
										HQ693380.1
										HQ693378.1
										HQ693376.1
										HQ693374.1
										HQ693372.1
										HQ693370.1
										HQ693368.1
										HQ693366.1
										HQ693364.1
										HQ693362.1
										HQ693362.1
										HQ693360.1
										HQ693358.1
										HQ693356.1
										HQ693354.1
										HQ693352.1
										HQ693350.1
										HQ693348.1
										HQ693346.1
										HQ693344.1
										HQ693342.1
										HQ693340.1
										HQ693338.1
										HQ693336.1
										HQ693334.1
										HQ693332.1
										HQ693330.1
										HQ693328.1
										HQ693326.1
										HQ693324.1
										HQ693322.1
										HQ693320.1
										HQ693318.1
										HQ693316.1
										HQ693314.1
										HQ693312.1
										HQ693310.1
										HQ693308.1
										HQ693306.1
										HQ693304.1
										HQ693302.1
										HQ693300.1
										HQ693298.1
										HQ693296.1
										HQ693294.1
										HQ693292.1
										HQ693290.1
										HQ693288.1
										HQ693286.1
										HQ693284.1
										HQ693282.1
										224762692
										EU152255.1
										EU152254.1
										AF003952.1
										AF007881.1
										FJ882149.1
										FJ882147.1
										FJ882145.1
										FJ882143.1
										FJ882141.1
										FJ882139.1
										FJ882137.1
										FJ882135.1
										FJ882133.1
										FJ882131.1
										FJ882129.1
										FJ882127.1
										FJ882124.1
										FJ882122.1
										FJ882120.1
										FJ882118.1
										FJ882116.1
										FJ882114.1
										FJ882112.1
										FJ882110.1
										FJ882108.1
										FJ882106.1
										FJ882100.1
										FJ882102.1
										FJ882104.1
										FJ882098.1
										FJ882096.1
										FJ882094.1
										FJ882092.1
										FJ882090.1
										FJ882148.1
										FJ882146.1
										FJ882144.1
										FJ882142.1
										FJ882140.1
										FJ882138.1
										FJ882136.1
										FJ882134.1
										FJ882132.1
										FJ882130.1
										FJ882128.1
										FJ882126.1
										FJ882123.1
										FJ882121.1
										FJ882119.1
										FJ882117.1
										FJ882115.1
										FJ882113.1
										FJ882111.1
										FJ882109.1
										FJ882105.1
										FJ882103.1
										FJ882107.1
										FJ882101.1
										FJ882099.1
										FJ882095.1
										FJ882093.1
										FJ882091.1
										FJ882089.1
										AF395891.1
										AF329888.1
										AF329886.1
										AF329884.1
										AF329882.1
										AF329880.1
										AF329878.1
										AF329889.1
										AF329887.1
										AF329885.1
										AF329883.1
										AF329881.1
										AF329879.1
										AF239961.1
										AF239960.1
										AF239962.1
										EU628645.1
										EU628643.1
										EU628641.1
										EU628639.1
										EU628637.1
										EU628637.1
										EU628633.1
										EU628631.1
										EU628629.1
										EU628627.1
										EU628625.1
										EU628622.1
										EU628620.1
										EU628618.1
										EU628616.1
										EU628614.1
										EU628612.1
										EU628610.1
										EU628608.1
										EU628606.1
										EU628604.1
										EU628602.1
										EU628600.1
										EU628598.1
										EU628596.1
										EU628594.1
										EU628592.1
										EU628590.1
										EU628588.1
										EU628586.1
										EU628584.1
										EU628582.1
										EU628580.1
										EU628578.1
										EU628574.1
										EU628572.1
										EU628570.1
										EU628568.1
										EU628566.1
										EU628564.1
										EU628644.1
										EU628642.1
										EU628640.1
										EU628638.1
										EU628636.1
										EU628634.1
										EU628632.1
										EU628630.1
										EU628628.1
										EU628626.1
										EU628624.1
										EU628621.1
										EU628619.1
										EU628617.1
										EU628615.1
										EU628613.1
										EU628611.1
										EU628609.1
										EU628607.1
										EU628605.1
										EU628603.1
										EU628601.1
										EU628599.1
										EU628597.1
										EU628595.1
										EU628593.1
										EU628591.1
										EU628589.1
										EU628587.1
										EU628585.1
										EU628583.1
										EU628581.1
										EU628579.1
										EU628577.1
										EU628575.1
										EU628573.1
										EU628571.1
										EU628569.1
										EU628567.1
										EU628565.1
										EU152261.1
										EU152259.1
										EU152257.1
										EU152260.1
										EU152258.1
										EU152256.1
										EF547123.1
										EF547121.1
										EF547119.1
										EF547117.1
										EF547115.1
										EF547113.1
										EF547111.1
										EF547109.1
										EF547107.1
										EF547105.1
										EF547103.1
										EF547101.1
										EF547099.1
										EF547097.1
										EF547095.1
										EF547093.1
										EF547091.1
										EF547089.1
										EF547087.1
										EF547085.1
										EF547083.1
										EF547082.1
										EF547079.1
										EF547077.1
										EF547075.1
										EF547073.1
										EF547071.1
										EF547069.1
										EF547067.1
										EF547065.1
										EF547063.1
										EF547124.1
										EF547122.1
										EF547120.1
										EF547118.1
										EF547116.1
										EF547114.1
										EF547112.1
										EF547110.1
										EF547108.1
										EF547106.1
										EF547104.1
										EF547102.1
										EF547100.1
										EF547098.1
										EF547096.1
										EF547094.1
										EF547092.1
										EF547090.1
										EF547088.1
										EF547086.1
										EF547084.1
										EF547081.1
										EF547080.1
										EF547078.1
										EF547076.1
										EF547072.1
										EF547070.1
										EF547068.1
										EF547074.1
										EF547066.1
										EF547064.1
										3892620
										3892614
										3892608
										2980734
										2911648
										2980742
										2911675
										1134860
										2980702
										2980718
										2911656
										2980726
										2980710
										2911664
										2911640

## Sheet: Luteoviridae
	Luteoviridae
	cotton leafroll dwarf virus	beet western yellows virus	potato leafroll virus	soybean dwarf virus		barley yellow dwarf virus	barley yellow dwarf virus GAV	barley yellow dwarf virus PAV	sugarcane yellow leaf virus
	GQ401154.1	L40019	JQ346190	L20835.2		Z14123	AY610953.1	EU332335.1	GU190159.1
	GQ401152.1	L39968	JQ346189	FJ390404.1		U06866	AY610954.1	EU332331.1	GU190164.1
	GU167940.1	L39977	JQ346191	FJ390402.1		U06865	AY220739.1	EU332329.1	GU570007.1
	HQ827780.1	L39985	JQ420902	FJ390405.1		AJ007492	EU402390.1	EU332327.1	GU570008.1
	GQ401150.1	L39967	JQ420904	FJ390403.1		AJ007491	EU402388.1	EU332325.1	GU570006.1
	GQ401148.1	L39970	JQ420901	FJ390401.1		AJ223587	EU402386.1	EU332323.1	GU327735.1
	GQ401146.1	L40010	JQ420903	EU419583.1		AJ223589	EU402391.1	EU332321.1	AM072755.1
	GQ401144.1	L40012	JQ420905	EU419581.1		AJ223586	EU402389.1	EU332319.1	AM072753.1
	GQ401142.1	L40014	AF453393	EU419579.1		AJ223588	EU402387.1	EU332317.1	AM072751.1
	GQ401140.1	L40016	AF453391	EU419577.1		AJ007918	EU386815.1	EU332315.1	AM072756.1
	GQ401138.1	L40020	AF453389	EU419575.1		AJ007920	EU386813.1	EU332313.1	AM072754.1
	GQ401153.1	L39971	AF453390	EU419573.1		AJ007922	EU386811.1	EU332311.1	AM072752.1
	GQ401151.1	X13062	AF453388	EU419571.1		AJ007924	EU386809.1	EU332309.1	AM072750.1
	GQ401149.1	L39980	M89926	EU419584.1		AJ007926	EU386807.1	EU332307.1	AJ249447.1
	GQ401147.1	L39973	DQ315385	EU419582.1		AJ007928	EU386805.1	EU332336.1	GU190168.1
	GQ401145.1	L39975	EU073861	EU419580.1		AJ007919	EU386803.1	EU332334.1	GU190166.1
	GQ401143.1	L39979	EU073862	EU419578.1		AJ007921	EU386801.1	EU332332.1	HQ342888.1
	GQ401141.1	L39986	U73777	EU419576.1		AJ007923	EU386799.1	EU332330.1	GU190162.1
	GQ401139.1	L39974	S77421	EU419574.1		AJ007925	EU386797.1	EU332328.1	GU190160.1
	GQ401137.1	L39976	U74377	EU419572.1		AJ007927	EU386795.1	EU332326.1	GU190167.1
	EU871550.1	L39969	AF271215	EU419570.1		AJ007929	EU386793.1	EU332324.1	GU190165.1
	EU871548.1	HM804472	FJ481108	EU095846.1		X17260	EU386791.1	EU332322.1	GU190163.1
	EU871546.1	HM804471	AY007727	EU095847.1		X17261	EU386789.1	EU332320.1	GU190161.1
	EU871544.1	EU636991	AF296280	DQ145545.1		X17259	EU386787.1	EU332318.1	GU570005.1
	EU871542.1	EU636990	FJ859027	AB076038.1		EF153723	EU386785.1	EU332316.1	AF369929.1
	EU871540.1		FJ859025	U51448.2		EF153722	EU386783.1	EU332314.1	AF369927.1
	EU871538.1		FJ859023	L24049.1		X53174	EU386781.1	EU332312.1	AF369925.1
	EU871536.1		FJ859021			X56050	EU386779.1	EU332310.1	AF369923.1
	EU871534.1		FJ859019			AF216863	EU386777.1	EU332308.1	AF369928.1
	EU871532.1		FJ859017				EU386775.1	AF235167.1	AF369926.1
	EU871530.1		FJ859015				EU386773.1	EF521836.1	AF369924.1
	EU871551.1		FJ853193				EU386814.1	EF521850.1	AY236971.1
	EU871549.1		FJ853191				EU386812.1	EF521847.1
	EU871547.1		FJ853189				EU386810.1	EF521845.1
	EU871545.1		FJ859026				EU386808.1	EF521843.1
	EU871543.1		FJ859024				EU386806.1	EF521838.1
	EU871541.1		FJ859022				EU386804.1	EF521835.1
	EU871539.1		FJ859020				EU386802.1	EF521833.1
	EU871537.1		FJ859018				EU386800.1	EF521831.1
	EU871535.1		FJ859016				EU386798.1	EF521828.1
	EU871533.1		FJ859014				EU386796.1	EF521849.1
	EU871531.1		FJ853192				EU386792.1	EF043235.1
	EU871529.1		FJ853190				EU386794.1	EF521846.1
	GQ379224.1		DQ309064				EU386790.1	EF521844.1
			GU256062				EU386788.1	EF521842.1
			GQ376029				EU386786.1	EF521840.1
			DQ269981				EU386784.1	EF521834.1
			AY307123				EU386782.1	EF521832.1
			AF539791				EU386780.1	EF521829.1
			X74789				EU386778.1	AY855920.1
			X77323				EU386776.1	AJ810418.1
			A07935				EU386774.1	X07653.1
			A07943					D11032.1
			EU717545					AJ295639.1
			EU313202
			EU717546
			AY138970
			D13954
			D00530

## Sheet: Potyvirus
	Potyvirus
	banana bract mosaic virus	chilli veinal mottle virus	cowpea aphid boarne mosaic virus	dasheen mosaic virus	leek yellow stripe virus	maize dwarf mosaic virus	onion yellow dwarf virus	papaya ringspot virus	peanut stripe virus	pepper mottle virus	plum pox virus	potato virus A	potato virus V	sorghum mosaic virus	soybean mosaic virus	sugarcane mosaic virus	sweet potato virus Y	tobacco vein banding mosaic virus	turnip mosaic virus	watermelon mosaic virus	yam mild mosaic virus	zucchini yellow mosaic virus
	HQ709166.1	HM595741.1	DQ397531.1	AF048981.1	AF071525.1	U07216.1	JN127343.1	JN132470.1	HM776115.1	JN222367.1	HQ840521.1	GU144320.1	GU144344.1	U57360.1	FJ376388.1	DQ647652.1	EU218529.1	L28816.1	AF103786.1	AB693979.1	AF548525.1	AF127934.1
	HQ709164.1	HQ317868.1	DQ397529.1	JN692172.1	JN127340.1	FM883164.2	JN127344.1	JN132468.1	HM776113.1	EU586135.1	HQ840519.1	GU144318.1	GU144342.1	U07219.1	AF242844.1	DQ647661.1	AY459614.1	AF274315.1	AY912100.1	JF273468.1	AF548523.1	EU999759.1
	HQ709162.1	HQ317867.1	DQ397527.1	JN692173.1	JN127339.1	FM883211.2	JN127342.1	JN132466.1	HM776111.1	EU586133.1	FN424179.1	GU144316.1	GU144340.1	FM997909.1	FJ640980.1	DQ647659.1	AY459612.1	EU734432.1	AY912098.1	JF273466.1	AF548521.1	EU999757.1
	HQ709165.1	GU170808.1	DQ397525.1	U08124.1	AB194623.1	DQ973169.1	FJ765739.1	JN132464.1	HM776109.1	EU586131.1	FN424177.1	GU144314.1	GU144338.1	FM997907.1	AY216010.1	DQ647653.1	AY459610.1	EF219408.1	AY912096.1	JF273464.1	AF548519.1	EU999758.1
	HQ709163.1	GU170807.1	DQ397532.1	U00122.1	AB194621.1	FM883228.1	DQ925455.1	JN132462.1	HM776107.1	EU586129.1	FN424175.1	GU144312.1	GU144336.1	FM997905.1	AY294045.1	AY953351.1	AY459606.1	AB020524.1	AY912094.1	JF273462.1	AF548517.1	HM072431.1
	EU009210.1	EU081882.1	DQ397530.1	HQ207541.2	AB194622.1	FM883226.1	DQ925454.1	JN132458.1	HM776105.1	EU586127.1	FN424173.1	GU144310.1	GU144334.1	FM997903.1	AF200566.1	U57356.1	AY459604.1	AM236828.1	AY912099.1	JF273460.1	AF548515.1	AF513552.1
	HM348781.1	EF221615.1	DQ397528.1	HQ207539.2	GU373816.1	FM883224.1	AB219834.1	JN132456.1	HM776103.1	EU586125.1	FN424171.1	GU144308.1	GU144332.1	FM997901.1	FJ640981.1	U57354.1	AY459613.1	AM236826.1	AY912097.1	JF273458.1	AF548513.1	AF486822.1
	HM348779.1	EF213702.1	DQ397526.1	HQ207537.2	DQ925453.1	FM883222.1	AB000839.1	JN132454.1	HM776101.1	EU586123.1	FN424169.1	GU144306.1	GU144345.1	FM997899.1	FJ640979.1	U57357.1	AY459611.1	AM236824.1	AY912095.1	JF273469.1	AF548511.1	AY074810.1
	HM348782.1	EF213700.1	JF833431.1	HQ207535.2	DQ925452.1	FM883220.1	AB000845.1	JN132452.1	HM776099.1	EU586121.1	FN424167.1	GU144319.1	GU144343.1	FM997897.1	FJ640977.1	U57355.1	AY459607.1	AM236820.1	AY912093.1	JF273467.1	AF548509.1	AF486823.1
	HM348780.1	EF213698.1	JF833429.1	HQ207533.2	AY842134.2	FM883218.1	AB000838.1	JN132450.1	HM776097.1	EU586136.1	FN424165.1	GU144317.1	GU144341.1	FM997908.1	FJ640975.1	JN021933.1	AY459605.1	DQ464896.1	AF395676.1	JF273465.1	AF548505.1	AY074809.1
	HM348778.1	EF213696.1	JF833427.1	HQ207531.2	AY842136.1	FM883216.1	AB000843.1	JN132448.1	HM776095.1	EU586134.1	FN424180.1	GU144315.1	GU144339.1	FM997906.1	FJ640973.1	EU091075.1	AY459603.1	AM236827.1	AF395674.1	JF273463.1	AF548503.1	AF127932.1
	AY953427.1	EF213694.1	JF833425.1	HQ207529.2	AB005612.1	FM883214.1	AB000840.1	JN132446.1	HM776093.1	EU586132.1	FN424178.1	GU144309.1	GU144337.1	FM997904.1	FJ640971.1	AY569692.1	AM050888.1	AM236825.1	AF395677.1	JF273461.1	AF548501.1	AF127930.1
	AF071585.1	EF213692.1	JF833423.1	HQ207542.2	AB005610.1	FM883212.1	AB000837.1	JN132444.1	HM776091.1	EU586130.1	FN424176.1	GU144307.1	GU144335.1	FM997902.1	FJ640969.1	FM997895.1	AM050886.1	AM236823.1	AF395675.1	JF273459.1	AF548499.1	AF127931.1
	AF071586.1	EF213690.1	JF833421.1	HQ207540.2	AJ307057.1	FM883209.1	AB000836.1	JN132442.1	HM776089.1	EU586128.1	FN424174.1	AJ131400.1	GU144333.1	FM997900.1	FJ640967.1	FM997893.1	AM050884.1	AM236821.1	AF233890.1	AY437609.1	AF548497.1	JN561294.1
	AF071584.1	EF213688.1	JF833419.1	HQ207538.2	AJ292225.1	FM883207.1	AB219833.1	JN132440.1	HM776087.1	EU586126.1	FN424172.1	AJ131403.1	GU144331.1	FM997898.1	FJ640965.1	FM997891.1	AM050887.1	AM236819.1	AF233888.1	DQ399708.1	AF548495.1	AF127933.1
	AF071583.1	EF213686.1	JF833417.1	HQ207536.2	AJ409308.1	FM883205.1	Y11826.1	JN132438.1	HM776085.1	EU586124.1	FN424170.1	AJ131401.1	AJ516019.1	DQ925433.1	FJ640963.1	FM997889.1	AM050885.1	DQ464897.1	HQ637383.1	L22907.1	AF548493.1	JF797206.1
	EU699770.1	EF213684.1	JF833415.1	HQ207534.2	AJ409306.1	FM883203.1	AJ510223.1	JN132436.1	HM776083.1	EU586122.1	FN424168.1	AJ307035.1	AJ516017.1	DQ925434.1	FJ640961.1	FM997896.1		X77637.1	EF592532.1	EU660589.1	AF548491.1	EU561043.1
	EU414267.1	EF213680.1	JF833432.1	HQ207532.2	AJ409304.1	FM883201.1	AJ292231.1	JN132434.1	HM776081.1	AF501591.1	FN424166.1	Y14125.1	AJ516023.1	U57358.2	FJ640959.1	FM997894.1			EF592530.1	EU660587.1	AF548526.1	JF308189.1
	HM131454.1	EF213678.1	JF833428.1	HQ207530.2	AJ307032.1	FM883199.1	AJ292223.1	JN132430.1	HM776079.1	AB126033.1	HQ326086.1	Y11428.1	AJ516024.1	AJ310196.1	FJ640957.1	FM997892.1			EF592528.1	EU660585.1	AF548524.1	JF308188.1
	AF071588.1	EF213676.1	JF833426.1	FJ160764.2	AJ409307.1	FM883197.1	AJ292224.1	JN132428.1	HM776077.1	M96425.1	FN179153.1	Y11424.1	AJ516022.1	AJ310191.1	FJ640955.1	FM997890.1			EF592531.1	EU660583.1	AF548522.1	HM072432.1
	AF071589.1	EF213703.1	JF833424.1	DQ925465.1	AJ409305.1	FM883195.1	AJ409312.1	JN132426.1	HM776075.1	AB098560.1	FN179154.1	Y11426.1	X61279.1	AJ310193.1	FJ640982.1	FM997888.1			EF592529.1	EU660581.1	AF548520.1	AM422386.1
	AF071582.1	EF213701.1	JF833422.1	DQ925466.1	AF538950.1	FM883193.1	AJ409310.1	JN132424.1	HM776073.1	AF227728.1	FN179152.1	Y11427.1	AY521595.1	AJ310195.1	FJ640978.1	GU474635.1			EF490562.1	EU660579.1	AF548518.1	L29569.1
	AF071587.1	EF213699.1	JF833420.1	DQ925464.1	AB551622.1	FM883191.1	AJ409313.1	JN132422.1	HM776071.1		AB576079.1	Y11425.1		AJ310194.1	FJ640976.1	AY195610.2			EF490560.1	EU660590.1	AF548516.1	EF122498.1
	AY776327.1	EF213697.1	JF833418.1	AM910406.1	DQ296002.1	FM883189.1	AJ409311.1	JN132420.1	HM776069.1		AB576077.1	Y11423.1		AJ310192.1	FJ640974.1	AY149118.1			EF490558.1	EU660588.1	AF548514.1	AY278998.1
	AY494979.1	EF213695.1	JF833416.1	AM910404.1	AY007693.1	FM883187.1	AJ409309.1	JN132418.1	HM776067.1		AB576073.1	Y11421.1			FJ640972.1	DQ925431.1			EF490556.1	EU660586.1	AF548512.1	AY278999.1
	DQ851496.1	EF213693.1	AF083558.1	AM910402.1	D28590.1	FM883185.1	AB000841.1	JN132416.1	HM776065.1		AB576075.1	Y11422.1			FJ640970.1	DQ925429.1			EF490554.1	EU660584.1	AF548510.1	AF127929.2
		EF213691.1	U72204.1	AM910407.1		FM883183.1	AB551621.1	JN132414.1	HM776063.1		AB576071.1	Z21670.1			FJ640968.1	DQ925427.1			EF490552.1	EU660582.1	AF548508.1	DQ925451.1
		EF213689.1	AF368424.1	AM910405.1		FM883181.1	AB000472.1	JN132412.1	HM776061.1		AB576069.1				FJ640966.1	DQ925432.1			EF490550.1	EU660580.1	AF548506.1	DQ925449.1
		EF213687.1	AY434454.1	AM910403.1		FM883179.1	AB000473.1	JN132410.1	HM776059.1		AB576067.1				FJ640964.1	DQ925430.1			EF490548.1	EU660578.1	AF548504.1	DQ925447.1
		EF213685.1	AF241233.1	AM910401.1		FM883177.1	AB000474.1	JN132408.1	HM776057.1		AB576065.1				FJ640962.1	DQ925428.1			EF490546.1	D13913.1	AF548502.1	DQ925450.1
		EF213683.1	AY433952.1	AM910399.1		FM883175.1	D73378.1	JN132471.1	HM776130.1		AB576063.1				FJ640960.1	DQ925426.1			EF490544.1	AB218280.1	AF548500.1	DQ925448.1
		EF213681.1	AY433950.1	EU420058.1		FM883173.1		JN132469.1	HM776128.1		AB576061.1				FJ640958.1	DQ973170.1			EF490542.1	AB127934.1	AF548498.1	GQ482976.1
		EF213679.1	AY253911.1	AJ628756.1		FM883171.1		JN132467.1	HM776126.1		AB576059.1				FJ640956.1	DQ315498.1			EF490540.1		AF548496.1	AY611026.1
		EF213677.1	AY253909.1	AJ298033.1		FM883169.1		JN132465.1	HM776124.1		AB576045.1				FJ640954.1	DQ315496.1			EF490538.1		AF548494.1	AY611025.1
		EF213675.1	AY253907.1	AJ298036.1		FM883167.1		JN132463.1	HM776122.1		AB576047.1				FJ548849.1	DQ315494.1			EF490536.1		AF548492.1	AY611024.1
		DQ925445.1	AY253910.1	AJ298034.1		FM883165.1		JN132461.1	HM776120.1		AB576049.1				AY216987.1	DQ315492.1			EF490534.1			AF513551.1
		DQ925443.1	AY253908.1	AJ298035.1		FM883227.1		JN132459.1	HM776118.1		AB576051.1				FJ807701.1	DQ315490.1			EF490559.1			AY074808.1
		DQ925441.1	AY253906.1			FM883225.1		JN132457.1	AF200623.1		AB576053.1				FJ807700.1	DQ315497.1			EF490557.1			AF513550.1
		DQ925446.1	AY505342.1			FM883223.1		JN132455.1	AF200624.1		AB576055.1				AJ628754.1	DQ315495.1			EF490555.1			AB458596.1
		DQ925444.1	EU004070.2			FM883221.1		JN132453.1	AF191748.1		AB576057.1				AJ628752.1	DQ315493.1			EF490553.1			AB458595.1
		DQ925442.1	Y17822.1			FM883219.1		JN132451.1	HM776129.1		AB576066.1				AJ628750.1	DQ315491.1			EF490551.1			AF435425.1
		DQ925440.1	X82873.1			FM883217.1		JN132449.1	AF073380.1		AB576068.1				AJ628755.1	DQ315489.1			EF490549.1			AY611022.1
		AM909717.1	Y17824.1			FM883215.1		JN132447.1	HM776127.1		AB576072.1				AJ628753.1	DQ369960.1			EF490547.1			AY611023.1
		GQ981316.1	AJ132414.1			FM883213.1		JN132445.1	HM776125.1		AB576074.1				AJ628751.1	AY836523.1			EF490545.1			AY611021.1
		AJ972878.1	Y18634.1			FM883210.1		JN132443.1	HM776123.1		AB576076.1				AJ507388.2	DQ846832.1			EF490543.1			AJ889244.1
		AJ237843.3				FM883208.1		JN132441.1	HM776121.1		AB576078.1				AJ310200.1	DQ647651.1			EF490541.1			EF062582.1
		U72193.1				FM883206.1		JN132439.1	HM776119.1		AB576064.1				AJ609297.1	DQ438949.1			EF490539.1			EF062583.1
		NC_005778.1				FM883204.1		JN132437.1	HM776117.1		AB576062.1				NC_002634.1	AM110759.1			EF490537.1			AB188115.1
						FM883202.1		JN132435.1	HM776116.1		AB576060.1				AJ293277.1	AM501533.1			EF490535.1			AB188116.1
						FM883200.1		JN132433.1	HM776114.1		AB576054.1				D00507.2	AM501531.1			EF490533.1			AJ420019.1
						FM883198.1		JN132431.1	HM776112.1		AB576050.1					AJ310105.1			AB440238.1			AJ420017.1
						FM883196.1		JN132429.1	HM776110.1		AB576048.1					AJ310103.1			AB440239.1			AJ420015.1
						FM883194.1		JN132427.1	HM776108.1		AB576046.1					AJ278405.1			EU734434.1			AJ420013.1
						FM883192.1		JN132415.1	HM776106.1		AB545926.1					AJ310104.1			EF374098.1			AJ420020.1
						FM883190.1		JN132419.1	HM776104.1		HQ452388.1					AJ310102.1			DQ925463.1			AJ420018.1
						FM883188.1		JN132421.1	HM776102.1		HQ452386.1					AJ311168.1			DQ925461.1			AJ420016.1
						FM883186.1		JN132423.1	HM776098.1		HQ452384.1					AJ311169.1			DQ925459.1			AJ420014.1
						FM883184.1		JN132425.1	HM776096.1		HQ452382.1					AJ006201.1			DQ925462.1			AJ420012.1
						FM883182.1		JN132413.1	HM776100.1		HQ452378.1					AJ006199.1			DQ925460.1			AJ251527.1
						FM883180.1		JN132411.1	HM776094.1		HQ452376.1					AJ006202.1			DQ648592.1			AJ316228.2
						FM883178.1		JN132409.1	HM776090.1		HQ452372.1					AJ006200.1			DQ648591.1			AJ316229.2
						FM883176.1			HM776092.1		HQ452370.1					AJ310117.1			AF394601.1			AJ307036.2
						FM883174.1			HM776088.1		HQ452368.1					AJ310115.1			AF394602.1			AJ515911.1
						FM883172.1			HM776086.1		HQ452366.1					AJ310113.1			AY995214.2			AJ429071.1
						FM883170.1			HM776084.1		HQ452360.1					AJ310116.1			AB362512.1			AJ515907.1
						FM883168.1			HM776082.1		HQ452358.1					AJ310114.1			AB362513.1			AJ515910.1
						FM883166.1			HM776080.1		HQ452356.1					AJ310112.1			AB105134.1			AB127936.1
						AF540989.1			HM776078.1		HQ452354.1					X98166.1			AB105135.1			AJ316227.1
						AM110758.1			HM776076.1		HQ452385.1					X98167.1			D88614.1			D13914.1
						AJ542536.1			HM776074.1		HQ452381.1					X98165.1			D10927.1			X62662.1
						AJ001691.1			HM776072.1		HQ452379.1					X98169.1			D10601.1			AF014811.2
						AJ563725.1			HM776070.1		HQ452377.1					X98168.1			AM850140.1			D00692.1
						AJ563726.1			HM776068.1		HQ452371.1					NC_003398.1			AB252143.1
						AJ563724.1			HM776066.1		HQ452369.1					AF494510.1			AB252141.1
						AJ437348.1			HM776064.1		HQ452365.1					AY590778.1			AB252139.1
						A34976.1			HM776062.1		HQ452363.1					AY639645.1			AB252137.1
						A34978.1			HM776060.1		HQ452361.1					D00948.1			AB252135.1
						A34974.1			HM776058.1		HQ452359.1								AB252133.1
						NC_003377.1			DQ367846.1		HQ452355.1								AB252131.1
						S77088.1			AF063222.1		DQ299538.1								AB252129.1
									DQ925418.1		AF440744.1								AB252127.1
									U34972.1		AF440746.1								AB252125.1
									U05771.1		AF440742.1								AB252123.1
									DQ925419.1		AF440745.1								AB252121.1
									AY968604.1		AF440743.1								AB252119.1
									Y11771.1		AF440741.1								AB252117.1
									Y11774.1		AY591253.1								AB252115.1
									Y11772.1		AY591254.1								AB252113.1
									Z21700.1		EU117116.1								AB252111.1
									X63559.1		GQ411056.1								AB252109.1
									Y11776.1		EU818840.1								AB252107.1
									Y11775.1		FM955843.1								AB252105.1
									Y11773.1		EF640939.1								AB252103.1
											EF640937.1								AB252101.1
											EF640935.1								AB252099.1
											EF640933.1								AB252097.1
											EF640938.1								AB252095.1
											EF640936.1								AB252142.1
											EF640934.1								AB252140.1
											AM184114.1								AB252138.1
											AM260935.1								AB252136.1
											AM260936.1								AB252134.1
											AM260933.1								AB252132.1
											EF611247.1								AB252130.1
											EF611243.1								AB252128.1
											X81073.1								AB252126.1
											X81077.1								AB252124.1
											X81075.1								AB252122.1
											X81080.1								AB252120.1
											X81082.1								AB252118.1
											X81079.1								AB252116.1
											X81074.1								AB252114.1
											X81076.1								AB252112.1
											X81084.1								AB252110.1
											X81078.1								AB252108.1
											AM260934.1								AB252106.1
											AM260937.1								AB252104.1
											AY912057.1								AB252102.1
											AY912058.1								AB252100.1
											AY912056.1								AB252098.1
											AY847269.1								AB252096.1
											AJ566345.1								AB252094.1
											AJ566346.1								AB194802.1
											AJ566344.1								AB194800.1
											Y09851.2								AB194798.1
											AJ306420.1								AB194796.1
																			AB194794.1
																			AB194792.1
																			AB194790.1
																			AB194788.1
																			AB194786.1
																			AB194801.1
																			AB194799.1
																			AB194797.1
																			AB194795.1
																			AB194793.1
																			AB194791.1
																			AB194789.1
																			AB194787.1
																			AB194785.1
																			AB179938.1
																			AB179936.1
																			AB179934.1
																			AB179932.1
																			AB179930.1
																			AB179928.1
																			AB179926.1
																			AB179924.1
																			AB179922.1
																			AB179920.1
																			AB179918.1
																			AB179916.1
																			AB179914.1
																			AB179912.1
																			AB179908.1
																			AB179906.1
																			AB179904.1
																			AB179902.1
																			AB179900.1
																			AB179898.1
																			AB179896.1
																			AB179894.1
																			AB179892.1
																			AB179890.1
																			AB179888.1
																			AB179988.1
																			AB179984.1
																			AB179982.1
																			AB179980.1
																			AB179976.1
																			AB179974.1
																			AB179972.1
																			AB179970.1
																			AB179968.1
																			AB179966.1
																			AB179964.1
																			AB179962.1
																			AB179960.1
																			AB179958.1
																			AB179956.1
																			AB179954.1
																			AB179952.1
																			AB179950.1
																			AB179948.1
																			AB179946.1
																			AB179944.1
																			AB179942.1
																			AB179940.1
																			AB093627.1
																			AB093625.1
																			AB093623.1
																			AB093621.1
																			AB093619.1
																			AB093617.1
																			AB093615.1
																			AB093613.1
																			AB093611.1
																			AB093609.1
																			AB093607.1
																			AB093605.1
																			AB093603.1
																			AB093601.1
																			AB093599.1
																			AB093597.1
																			AB076548.1
																			AB076502.1
																			AB076504.1
																			AB093620.1
																			AB093618.1
																			AB093616.1
																			AB093614.1
																			AB093612.1
																			AB093610.1
																			AB093608.1
																			AB093606.1
																			AB093604.1
																			AB093602.1
																			AB093600.1
																			AB093598.1
																			AB093596.1
																			AJ488152.1
																			X83968.1
																			AJ307040.1
																			AJ310205.1
																			AJ310207.1
																			AJ307038.1
																			AJ310204.1
																			AJ310206.1
																			AJ307039.1
																			AJ307037.1
																			AJ297629.2
																			AJ293279.1
																			Y09114.1
